# Supplementary material
Source: publisher site journal article supplement (https://natureconservation.pensoft.net/article/4416/download/suppl/31/)
Supplement: Supplementary file 1

## Supplementary file 1: Annual trends in population size and collisions

Niemi et al. 2015: Traffic mortality of four ungulate species in southern Finland

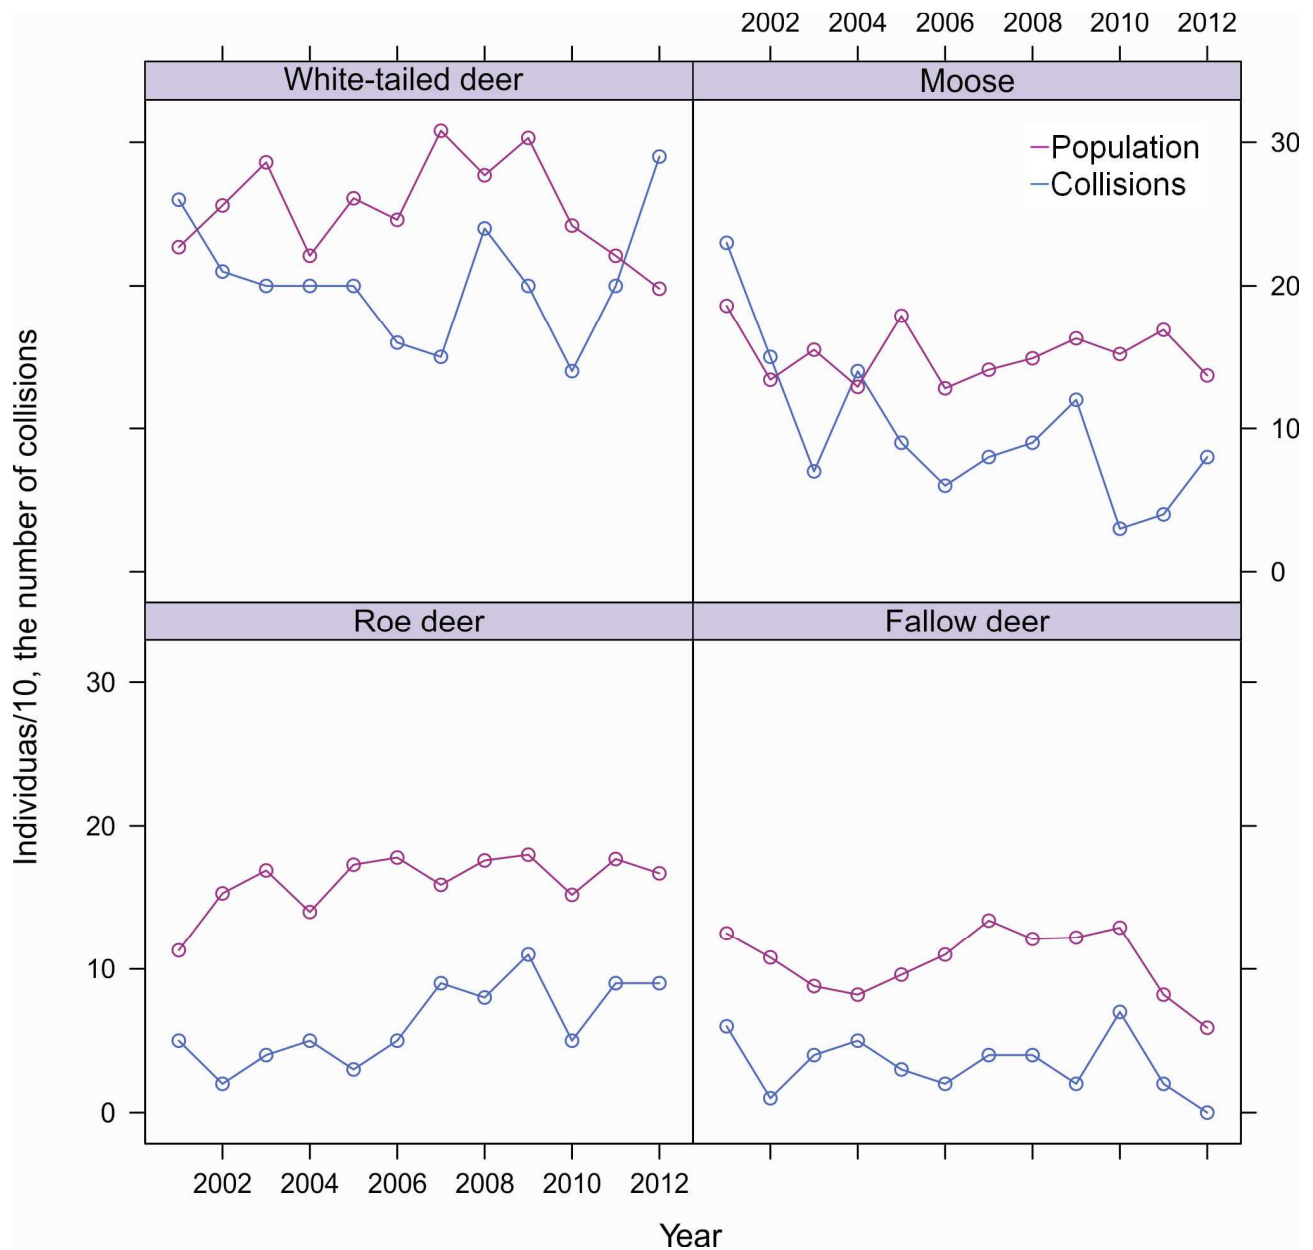

**Figure 1.** The annual trends in the winter population size (individuals/10) (purple line), and collisions (blue line) of four ungulate species in the Hyvinkää GMA between 2001 and 2012 (a total of 12 years).
